# Supplementary material
Source: Springer Nature journal article supplement (https://www.springermedizin.de/resource/supplementary/12943_2009_615_MOESM7_ESM.pdf/9554408)

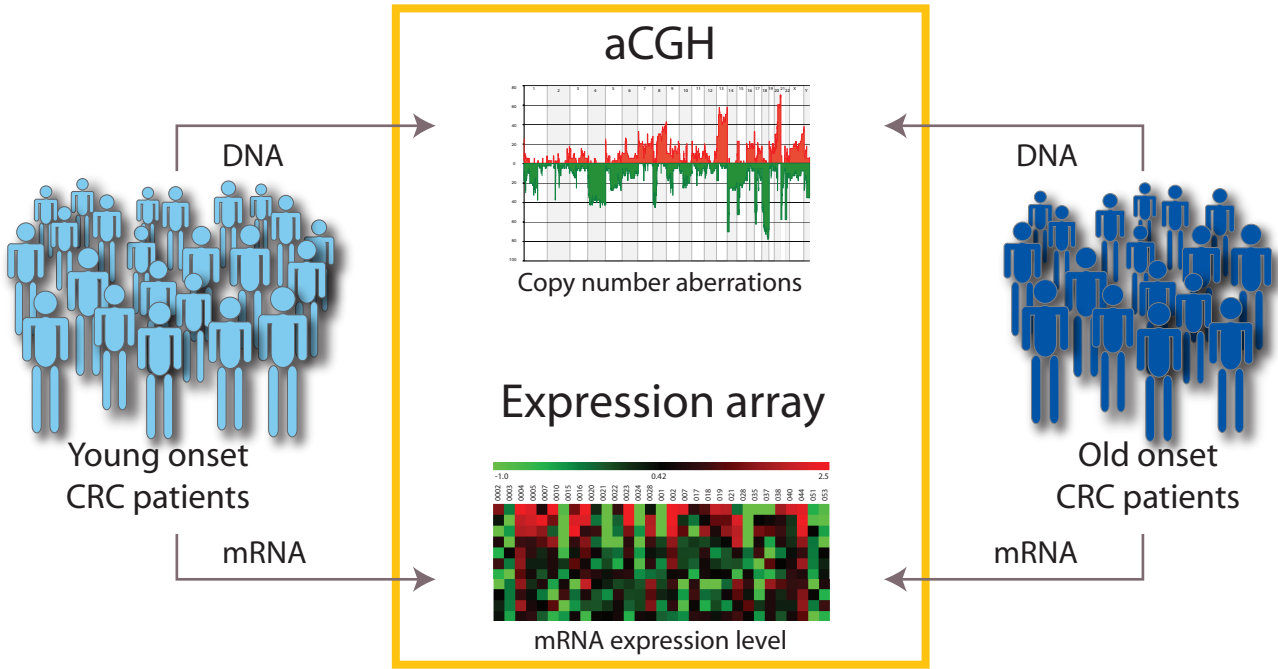

**Integration analysis**

Ratio mRNA expression  $\left[ \frac{\text{Gain}}{\text{Normal}} \right] > 1.5$       Ratio mRNA expression  $\left[ \frac{\text{Loss}}{\text{Normal}} \right] < 0.75$

No of genes

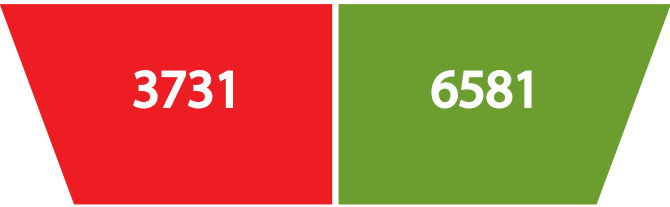

$p < 0.05$ , genome changes in early vs late

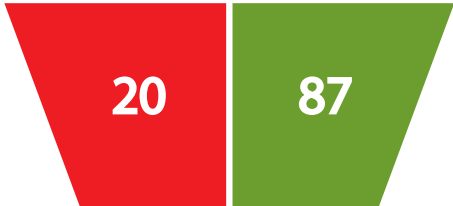

$p < 0.05$ , mRNA expression in early vs late

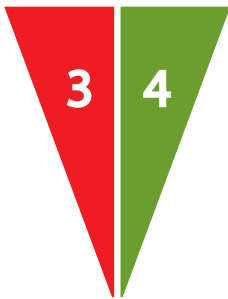

Supplement: MOESM7 [file 9554408]
